# Supplementary material
Source: publisher figshare collection journal article supplement (https://tandf.figshare.com/articles/dataset/_/5395249)
Supplement: Supplementary file 1 [file 1]

# Supplementary Materials: Additive Gaussian Process for Computer Models With Qualitative and Quantitative Factors

X. Deng<sup>†</sup>, C. Devon Lin<sup>‡1</sup>, K-W. Liu<sup>§</sup> and R.K. Rowe<sup>§</sup>

<sup>†</sup>Department of Statistics, Virginia Tech

<sup>‡</sup>Department of Mathematics and Statistics, Queen's University

<sup>§</sup>Department of Civil Engineering, Queen's University

## 1 Proof of Theorem 1

*Proof:* When  $q = 2$ , the theorem follows by noting

$$\hat{y}_1(\mathbf{w}_0) = \hat{\mu} + \phi_1^T(\mathbf{w}_0)(\Phi_1 + \Phi_2)^{-1}(\mathbf{y} - \hat{\mu}\mathbf{1}),$$

and

$$\begin{aligned}\hat{y}_2(\mathbf{w}_0) &= \phi_2^T(\mathbf{w}_0)\Phi_2^{-1}(\mathbf{y} - \hat{\mathbf{y}}_1) \\ &= \phi_2^T(\mathbf{w}_0)\Phi_2^{-1}[\mathbf{y} - \hat{\mu}\mathbf{1} - \Phi_1(\Phi_1 + \Phi_2)^{-1}(\mathbf{y} - \hat{\mu}\mathbf{1})] \\ &= \phi_2^T(\mathbf{w}_0)\Phi_2^{-1}[\mathbf{I} - \Phi_1(\Phi_1 + \Phi_2)^{-1}](\mathbf{y} - \hat{\mu}\mathbf{1}) \\ &= \phi_2^T(\mathbf{w}_0)\Phi_2^{-1}[(\Phi_1 + \Phi_2) - \Phi_1](\Phi_1 + \Phi_2)^{-1}(\mathbf{y} - \hat{\mu}\mathbf{1}) \\ &= \phi_2^T(\mathbf{w}_0)(\Phi_1 + \Phi_2)^{-1}(\mathbf{y} - \hat{\mu}\mathbf{1}),\end{aligned}$$

which leads to

$$\hat{y}_1(\mathbf{w}_0) + \hat{y}_2(\mathbf{w}_0) = \hat{\mu} + (\phi_1(\mathbf{w}_0) + \phi_2(\mathbf{w}_0))^T(\Phi_1 + \Phi_2)^{-1}(\mathbf{y} - \hat{\mu}\mathbf{1}). \quad (1)$$

Now for a general  $q \geq 3$ , note that

$$\begin{aligned}\hat{y}_{q-1}(\mathbf{w}_0) &= \phi_{q-1}^T(\mathbf{w}_0)(\Phi_{q-1} + \Phi_q)^{-1}\mathbf{e}_{q-2}, \\ \hat{y}_q(\mathbf{w}_0) &= \phi_q^T(\mathbf{w}_0)\Phi_q^{-1}(\mathbf{e}_{q-2} - \hat{\mathbf{y}}_{q-1}).\end{aligned}$$

---

<sup>1</sup>Address for correspondence: C. Devon Lin, Associate Professor, Department of Mathematics and Statistics, Queen's University, Kingston, ON Canada (E-mail: cdlin@mast.queensu.ca).

By applying the derivation and results in (1), we have

$$\begin{aligned}\hat{y}_{q-1}(\mathbf{w}_0) + \hat{y}_q(\mathbf{w}_0) &= (\phi_{q-1}(\mathbf{w}_0) + \phi_q(\mathbf{w}_0))^T (\Phi_{q-1} + \Phi_q)^{-1} \mathbf{e}_{q-2} \\ &= (\phi_{q-1}(\mathbf{w}_0) + \phi_q(\mathbf{w}_0))^T (\Phi_{q-1} + \Phi_q)^{-1} (\mathbf{e}_{q-3} - \hat{\mathbf{y}}_{q-2}).\end{aligned}\quad (2)$$

We also note that

$$\hat{y}_{q-2}(\mathbf{w}_0) = \phi_{q-2}^T(\mathbf{w}_0) (\Phi_{q-2} + \Phi_{q-1} + \Phi_q)^{-1} \mathbf{e}_{q-3}. \quad (3)$$

Using (2) and (3), we can again apply the derivation and results in (1) to obtain

$$\hat{y}_{q-2}(\mathbf{w}_0) + \hat{y}_{q-1}(\mathbf{w}_0) + \hat{y}_q(\mathbf{w}_0) = (\phi_{q-2}(\mathbf{w}_0) + \phi_{q-1}(\mathbf{w}_0) + \phi_q(\mathbf{w}_0))^T (\Phi_{q-2} + \Phi_{q-1} + \Phi_q)^{-1} \mathbf{e}_{q-3}.$$

Now we can continue this procedure recursively to  $\hat{y}_2(\mathbf{w}_0)$ , which gives

$$\hat{y}_2(\mathbf{w}_0) + \cdots + \hat{y}_q(\mathbf{w}_0) = (\phi_2(\mathbf{w}_0) + \cdots + \phi_q(\mathbf{w}_0))^T (\Phi_2 + \cdots + \Phi_q)^{-1} \mathbf{e}_1.$$

Combing with  $\hat{y}_1(\mathbf{w}_0) = \hat{\mu} + \phi_1^T(\mathbf{w}_0) (\sum_{j=1}^q \Phi_j)^{-1} (\mathbf{y} - \hat{\mu} \mathbf{1})$ , we have

$$\hat{y}_1(\mathbf{w}_0) + \hat{y}_2(\mathbf{w}_0) + \cdots + \hat{y}_q(\mathbf{w}_0) = (\phi_1(\mathbf{w}_0) + \cdots + \phi_q(\mathbf{w}_0))^T (\Phi_1 + \cdots + \Phi_q)^{-1} (\mathbf{y} - \hat{\mu} \mathbf{1}).$$

This completes the proof.  $\square$
